# Supplementary material for: Non-small cell lung cancer associated microRNA expression signature: integrated bioinformatics analysis, validation and clinical significance
Source: Oncotarget. 2017 Feb 21;8(15):24564–78. doi: 10.18632/oncotarget.15596 (PMC5421870; doi:10.18632/oncotarget.15596)
Supplement: Supplementary file 1 [file oncotarget-08-24564-s001.pdf]

# Non-small cell lung cancer associated microRNA expression signature: integrated bioinformatics analysis, validation and clinical significance

## Supplementary Materials

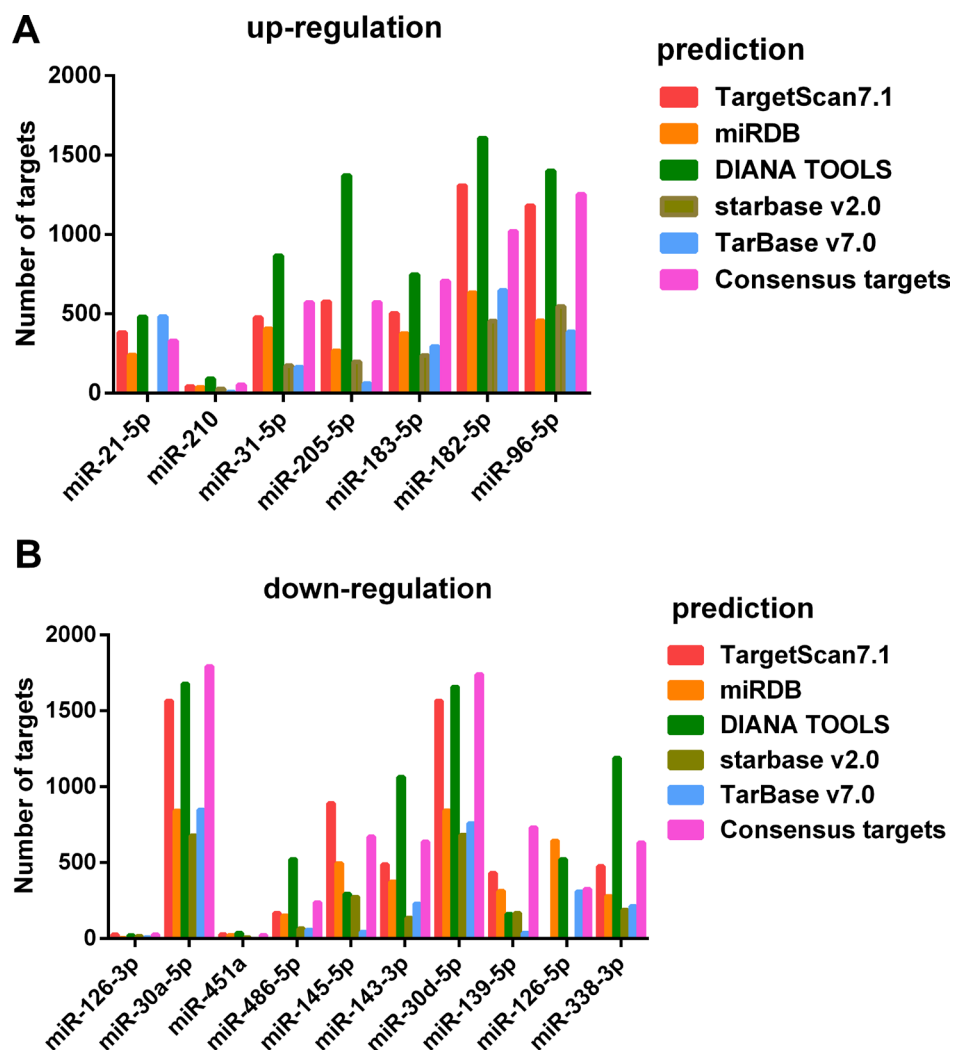

**Supplementary Figure 1: Predicted and experimentally validated targets of integrated miRNAs.** Shown is the number of targets predicted by three target prediction algorithms and validated target databases Tarbase and starBase. Consensus targets were defined as genes predicted by at least 2 algorithms plus validated targets from TarBase and starBase.

**Supplementary Table 1: Characteristics of the patients**

| No. | gender | age | smoking history | histological type | tumor tissue site | pathologic stage |
|-----|--------|-----|-----------------|-------------------|-------------------|------------------|
| 1   | male   | 60  | YES             | AD                | R-Middle          | Stage IIA        |
| 2   | male   | 70  | YES             | SCC               | L-Lower           | Stage IIA        |
| 3   | female | 51  | NO              | AD                | R-Lower           | Stage IA         |
| 4   | male   | 78  | NO              | AD                | R-Middle          | Stage IIIA       |
| 5   | male   | 73  | YES             | SCC               | R-Upper           | Stage IB         |
| 6   | male   | 61  | YES             | AD                | R-Upper           | Stage IIB        |
| 7   | male   | 59  | YES             | SCC               | L-Upper           | Stage IB         |
| 8   | male   | 60  | YES             | SCC               | L-Upper           | Stage IIB        |
| 9   | female | 43  | NO              | AD                | R-Lower           | Stage IIA        |
| 10  | female | 63  | NO              | AD                | R-Upper           | Stage IIIA       |
| 11  | male   | 36  | YES             | AD                | R-Upper           | Stage IIA        |
| 12  | female | 66  | NO              | AD                | L-Upper           | Stage IA         |

AD, adenocarcinoma; SCC, Squamous cell carcinoma.

**Supplementary Table 2: Information of the primers**

| miRNA ID   | Species | Accession number | Sequence                 |
|------------|---------|------------------|--------------------------|
| miR-21-5p  | human   | MIMAT0000076     | uagcuuauacagacugauguuga  |
| miR-210-3p | human   | MIMAT0000267     | cugugcgugugacagcggcuga   |
| miR-205-5p | human   | MIMAT0000266     | uccuauauccaccggagucug    |
| miR-182-5p | human   | MIMAT0000259     | uuuggcaaugguagaacucacacu |
| miR-31-5p  | human   | MIMAT0000089     | aggcaagaugcuggcgaugcu    |
| miR-183-5p | human   | MIMAT0000261     | uauggcacugguagaauucacu   |
| miR-96-5p  | human   | MIMAT0000095     | uuuggcacuagcacauuuuugcu  |
| miR-126-3p | human   | MIMAT0000445     | ucguaccgugaguaauaauugcg  |
| miR-30a-5p | human   | MIMAT0000087     | uguaaacauccucgacuggaag   |
| miR-451a   | human   | MIMAT0001631     | aaaccguuaccuuacugaguu    |
| miR-486-5p | human   | MIMAT0002177     | uccguacugagcugccccgag    |
| miR-145-5p | human   | MIMAT0000437     | guccaguuuuccaggaaucuccu  |
| miR-143-3p | human   | MIMAT0000435     | ugagaugaagcacuguagcuc    |
| miR-30d-5p | human   | MIMAT0000245     | uguaaacaucuccgacuggaag   |
| miR-139-5p | human   | MIMAT0000250     | ucucagugcagcugucuccagu   |
| miR-126-5p | human   | MIMAT0000444     | cauuuuuacuuuugguacgcg    |
| miR-338-3p | human   | MIMAT0000763     | uccagcaucagugauuuuguug   |
